# Supplementary material for: Next-Generation Sequencing in Clinical Molecular Diagnostics of Cancer: Advantages and Challenges
Source: MDPI journal article supplement (doi:10.3390/cancers7040874), 2015-10-14
Supplement: s1 [file s1]

## Supplementary Materials

**Table S1.** Comparison of direct costs for NGS-based test and traditional platforms. A comparison of direct costs (including reagents, personnel hands-on time and consumables costs) for commonly tested markers like *BRAF*, *NRAS*, *KIT*, *JAK2* as analyzed by traditional platforms and a NGS test are listed below.

| Gene                                                                                      | Assay Technique                                                       | Direct Cost (\$) * |
|-------------------------------------------------------------------------------------------|-----------------------------------------------------------------------|--------------------|
| <i>BRAF</i>                                                                               | Pyrosequencing (Codon 600)                                            | 245.00             |
| <i>NRAS</i>                                                                               | Pyrosequencing (Codons 12,13 and 61)                                  | 261.13             |
| <i>KIT</i>                                                                                | Sanger Sequencing (Exons 9, 11, 13, 17)                               | 419.35             |
| <i>JAK2</i> (p. V617F)                                                                    | Sanger Sequencing                                                     | 277.07             |
| <i>JAK2</i> (p. V617F)                                                                    | Pyrosequencing                                                        | 208.16             |
| <i>50 gene panel</i><br>(including <i>BRAF</i> , <i>NRAS</i> , <i>KIT</i> , <i>JAK2</i> ) | NGS (Ion Torrent PGM)<br>50-cancer related genes<br>Hotspot mutations | 574.20             |

\* The direct costs include reagents, labor and consumables. They can vary -for each lab depending upon any discount rates extended by the vendor and personnel costs.

**Table S2.** Comparison of Analytical sensitivity of NGS to traditional sequencing and other NGS platforms. A comparison of the sensitivity of NGS platforms validated in our laboratory to other sequencing technologies as has been summarized.

| NGS Panel                                      | NGS Sensitivity Compared to |                 |                             |        |                        |
|------------------------------------------------|-----------------------------|-----------------|-----------------------------|--------|------------------------|
|                                                | Sanger Sequencing           | Pyro Sequencing | Primer Extension-Mass Array | NGS    | MIP & Array (for CNVs) |
| <i>46 gene</i><br>( <i>Ion Torrent-PGM</i> )   | 96% *                       | 100%            | 100%                        | NA     | NA                     |
| <i>53 gene panel</i><br>( <i>MiSeq</i> )       | 100%                        | 100%            | NA                          | 100% # | NA                     |
| <i>409 gene panel</i><br>( <i>Ion Proton</i> ) | 100%                        | NA              | NA                          | 95% \$ | 100%                   |

\* Missed large insertions and deletions due to variant caller issues. Fixed by upgraded version of the software; # As compared to 46 gene panel on Ion Torrent PGM; \$ As compared to 46 gene panel using Ion Torrent PGM. Missed calls were due to failed sequencing or lack of sequencing coverage in the 409 gene panel; & MIP Array (OnoScan Molecular Inversion Probe array, Affymetrix).
